# Supplementary material for: Comparative metabolomic profiling of Arabidopsis thaliana roots and leaves reveals complex response mechanisms induced by a seaweed extract
Source: Front Plant Sci. 2023 Mar 9;14:1114172. doi: 10.3389/fpls.2023.1114172 (PMC10035662; doi:10.3389/fpls.2023.1114172)
Supplement: Supplementary file 9 [file Table_5.xlsx]

## Sheet: Supplementary Table S5
Supplementary Table S5. Metabolites that were significantly changed in accumulation in the leaves and showed changes or no changes in accumulation in the roots.
Metabolites	Formula	mzCloud Best Match	FISh score	HMDB ID	KEGG ID	Class	0DR	3DR	5DR	0DL	3DL	5DL	References
13-HPOT	C18 H30 O4	-	75	HMDB0301803	C04785	Lipids	0.41	-1.02	-0.85	0.38	-0.83	-0.25	Ruan et al. (2019)
Traumatic Acid	C12 H20 O4	-	38.5	HMDB0000933	C16308	Lipids	0	-0.94	0	0.31	-0.06	-0.77	Pietryczuk et al. (2013)
OPC-8:0 related	C18 H28 O3	77	66.7	-	-	Lipids	0.36	-0.18	0.17	0.07	-0.77	-0.48	Ruan et al. (2019)
12-Hydroxy JA	C12 H18 O4	-	50	-	C21669	Lipids	0.31	0	0	0.61	-0.76	-0.36	Wasternack (2007)
Jasmonic acid	C12 H18 O3	77.2	33.3	HMDB0032797	C08491	Lipids	0	0	0	-0.14	-0.39	-0.75	Ghorbel et al. (2021)
9(S)-HPODE	C18 H32 O4	70.7	38.9	HMDB0006940	C14827	Lipids	0.16	0	0	-0.23	-1.01	-0.74	Singh et al. (2022)
Glyceric acid	C3 H6 O4	95.5	90	HMDB0000139	C00258	Carbohydrates	-0.54	0.43	0.31	-0.44	-0.93	0	Khan et al. (2019)
Zizybeoside II	C25 H38 O16	-	66.7	HMDB0034955	C17565	Carbohydrates	0	0	0	0.94	1.28	1.54	Fuel et al. (2021), Li et al. (2014)
Oxalosuccinic acid	C6 H6 O7	-	71.4	HMDB0003974	C05379	TCA cycle	0	0	0	0	0	-0.78	Guo et al. (2022)
5,6-Dihydrothymidine	C10 H16 N2 O5	-	37.5	-	-	Nucleic acids	0.26	-0.2	0	0.15	0.56	1.05	Griffiths et al. (1998)
N-feruloylglycine	C12 H13 N O5	-	33.3	HMDB0059747	C02564	Phenypropanoids	0.13	0.39	0.12	0.06	-1.4	-0.24	Tharanathan (2002), Valette et al. (2020)
Vanilloylglycine	C10 H11 N O5	-	45.8	HMDB0060026	-	Phenypropanoids	-0.01	-0.12	-0.14	-0.43	-0.82	-0.29	Kumar and Pruthi (2014)
3-Methoxyphenylacetic acid	C9 H10 O3	81.8	28.6	HMDB0059969	-	Phenypropanoids	0	0	0	-0.78	0.57	1.12	Misra (2016)
Grandisin	C24 H32 O7	-	66.7	-	C10622	Phenypropanoids	0	0	0	0.36	-1.36	-0.94	Marques et al. (2022)
2-(6'-methylthio)hexylmalic acid	C11 H20 O5 S	-	100	HMDB0304053	C17226	Glucosinolates	-0.1	-0.46	0.55	-0.03	0	0.94	Kitainda and Jez (2021), Textor et al. (2004)
3-(7'-methylthio)heptylmalic acid	C12 H22 O5 S	-	75	HMDB0304112	C17231	Glucosinolates	-0.03	-0.36	-0.84	0.08	0.56	0.85	Kitainda and Jez (2021), Textor et al. (2004)
3-Oxododecanoic acid	C12 H22 O3	-	100	HMDB0010727	C02367	Organic acids	0	0	0	0.54	-1.3	-1.53	Zandona et al. (2020)
Levulinic acid	C5 H8 O3	64.7	50	HMDB0000720	-	Organic acids	0	0	0	0.78	0	0.16	Akram and Ashraf (2013), Wu et al. (2018)
Malonic acid	C3 H4 O4	88.1	40	HMDB0000691	C00383	Organic acids	0.52	0.4	0.17	2.16	4.24	4.65	Li and Copeland (2000)
Oxopent-4-enoate	C5 H6 O3	-	37.5	-	C00596	Organic acids	0	0	0	1.58	0	0	Muto et al. (2013)
Luteolin	C15 H10 O6	66.9	33.3	HMDB0005800	C01514	Flavoids	0	0	0	0.01	-1.35	-0.52	Du et al. (2010)
kaempferol 7-O-ÃŸ-D-glucopyranoside	C21 H20 O11	-	44.4	HMDB0037429	C12249	Flavoids	0	0	0	0	-0.74	0	Lee et al. (2017)
Licoisoflavone A	C20 H18 O6	-	29.2	HMDB0034125	C10486	Flavoids	0.22	-1.02	-0.19	0.32	0.65	0.65	War et al. (2012)
Picolinic acid	C6 H5 N O2	98.1	40	HMDB0002243	C10164	Others	0	0.5	0	-0.07	0.35	0.8	Pan et al. (2018), Aucique-Perez et al. (2019)
Encecalin	C14 H16 O3	-	66.7	-	C09005	Others	0	0	0	0.51	0.62	0.83	Hernandez-Altamirano et al. (2020)
Methyl vinyl ketone	C4 H6 O	-	31.3	-	-	Others	0	0	0	0.26	0.61	0.32	Tani et al. (2020)
1-Linoleoyl glycerol	C21 H38 O4	75.1	100	HMDB0011568	-	Lipids	0.35	1.02	0.51	-0.08	-0.29	1.55	Aftab et al. (2020)
Octanoic acid	C8 H16 O2	80.2	53.9	HMDB0000482	C06423	Lipids	-0.77	0	0	-0.36	-0.37	-0.13	Yasuno & Wada (1998), Ramadan et al. (2022)
Itaconic acid	C5 H6 O4	89.5	20	HMDB0002092	C00490	Lipids	0.77	0.92	0.12	0.63	1.14	0.92	Wang et al. (2021)
Crotonic acid	C4 H6 O2	-	33.3	HMDB0010720	C01771	Lipids	-0.27	0.79	0.74	0.85	0.02	0.87	Jasicka-Misiak et al. (2005)
12-OPDA	C18 H28 O3	92	76.7	HMDB0301804	C01226Â	Lipids	3.3	-0.17	-0.7	0.39	-0.68	0.41	Huang et al. (2017)
9-KODE	C18 H30 O3	94.1	83.9	HMDB0004669	C14766	Lipids	1.48	-0.89	-0.29	0.13	-0.14	-0.68	Montillet et al. (2013)
LysoPE(16:1/0:0)	C21 H42 N O7 P	-	70.8	HMDB0011504	-	Lipids	0.84	0.4	1.23	1.92	0.91	-0.02	Volz et al. (2021)
L-Glutamic acid	C5 H9 N O4	80	82.4	HMDB0000148	C00025	Amino acids	-0.14	0.37	0.24	0.29	0.33	0.7	Forde and Lea (2007), Qiu et al. (2019)
L-Serine	C3 H7 N O3	88.1	34	HMDB0000187	C00065	Amino acids	-9.58	-1.07	0	-0.69	0	0	Zeier (2013)
L-Asparagine	C4 H8 N2 O3	-	35.7	HMDB0000168	C00152	Amino acids	-1.11	-0.9	0	0.29	0.65	0.33	Han et al. (2021)
N-Acetylvaline	C7 H13 N O3	74	71.4	HMDB0011757	-	Amino acids	0.27	0.8	0.5	0.09	0.19	0.24	Xiao et al. (2020)
D-Glucono-1,5-lactone	C6 H10 O6	65.1	37.5	HMDB0000150	C00198	Carbohydrates	2.29	0	0	0.29	9.21	10.13	Kurotani et al. (2022)
D-Glucose 6-phosphate	C6 H13 O9 P	92.4	60	HMDB0001401	C00092	Carbohydrates	0	-0.42	-0.69	-0.67	0	0	Hu et al. (2019)
beta-D-Xylose	C5 H10 O5	-	83.3	HMDB0000098	C02096	Carbohydrates	-0.21	-0.6	-0.28	-0.42	-0.6	-0.36	Zhang et al. (2021)
D-glucaro-1,5-lactone	C6 H8 O7	-	43	-	C20890	Carbohydrates	0.63	1.29	1.74	0.38	0.78	0	Mwamba et al. (2020)
Citric acid	C6 H8 O7	87.7	88.6	HMDB0000094	C00158	TCA cycle	1.07	0.37	-0.13	0.42	1.64	0.12	Gao et al. (2020)
Fumaric acid	C4 H4 O4	96.5	46.2	HMDB0000134	C00122	TCA cycle	1.11	0.84	0.7	0.05	0.29	0.53	Schwachtje et al. (2018)
DL-Malic acid	C4 H6 O5	97.7	100	HMDB0000744	C03668	TCA cycle	0.54	0	0	0.13	0.5	0.63	Schwachtje et al. (2018)
2-Oxoglutaric acid	C5 H6 O5	95.3	61.5	HMDB0000208	C00026	TCA cycle	0.53	1.37	1.31	0.34	1.77	1.23	Araujo et al. (2014)
trans-Aconitic acid	C6 H6 O6	87.3	31.8	HMDB0000958	C02341	TCA cycle	0	0	1.37	-0.52	-0.12	0.21	Igamberdiev and Eprintsev (2016)
IAA-glucose	C16 H19 N O7	-	40	-	C04197	Hormones	1.65	0.14	-0.03	0.62	-0.24	-0.14	Michalczuk and Bandurski (1982), Korasick et al. (2013)
Cytosine	C4 H5 N3 O	60.2	24	HMDB0000630	C00380	Nucleic acids	7.61	-1.48	0.26	0.76	-0.19	0	Biswas et al. (2018)
Ascorbic acid	C6 H8 O6	81.9	26.1	HMDB0000044	C01041	Vitamins	0.69	5.15	0.24	13.48	0.14	-0.54	Akram et al. (2017)
p-coumaroylagmatine	C14 H20 N4 O2	-	100	HMDB0033460	C04498	Phenypropanoids	0	0.06	0.89	-0.44	-0.39	-0.9	Muroi et al. (2009)
3-(5'-methylthio)pentylmalic acid	C10 H18 O5 S	-	50	HMDB0304110	C17223	Glucosinolates	-0.98	-0.18	0.8	-0.2	0.39	0.67	Kitainda and Jez (2021), Textor et al. (2004)
Acrylic acid	C3 H4 O2	99.5	66.7	HMDB0031647	C00511	Glucosinolates	0.19	0.79	0.46	0.22	0.39	0.51	Katz et al. (2020)
3-Hydroxybutyric acid	C4 H8 O3	84.1	57.1	HMDB0000357	C01089	Organic acids	0.32	0.97	-0.25	-0.56	1.8	-0.12	Li et al. (2017)
2-anisaldehyde	C8 H8 O2	78.7	38.5	HMDB0033766	-	Benzenoids	-0.26	-0.35	-0.25	0.02	0.07	0.61	Szelenyi et al. (2020)
Phenylglyoxylic acid	C8 H6 O3	60.6	40	HMDB0001587	C02137	Benzenoids	-0.15	-0.9	-0.57	-0.1	1.02	0.55	Wang et al. (2021)
Buchananine	C12 H15 N O7	-	33.3	-	C10134	Alkaloids	-0.38	-0.86	-0.34	-0.62	-0.53	-0.55	Sidiq et al. (2021)
Olivetol	C11 H16 O2	-	22.2	-	-	Others	0	0.28	0	0.36	0.68	0.63	Sirikantaramas and Taura (2017)
